# Supplementary material
Source: Springer Nature journal article supplement (https://www.springermedizin.de/resource/supplementary/12943_2009_734_MOESM12_ESM.pdf/9554690)

**Protein concentration (pg/mg)  
in liver tissue**

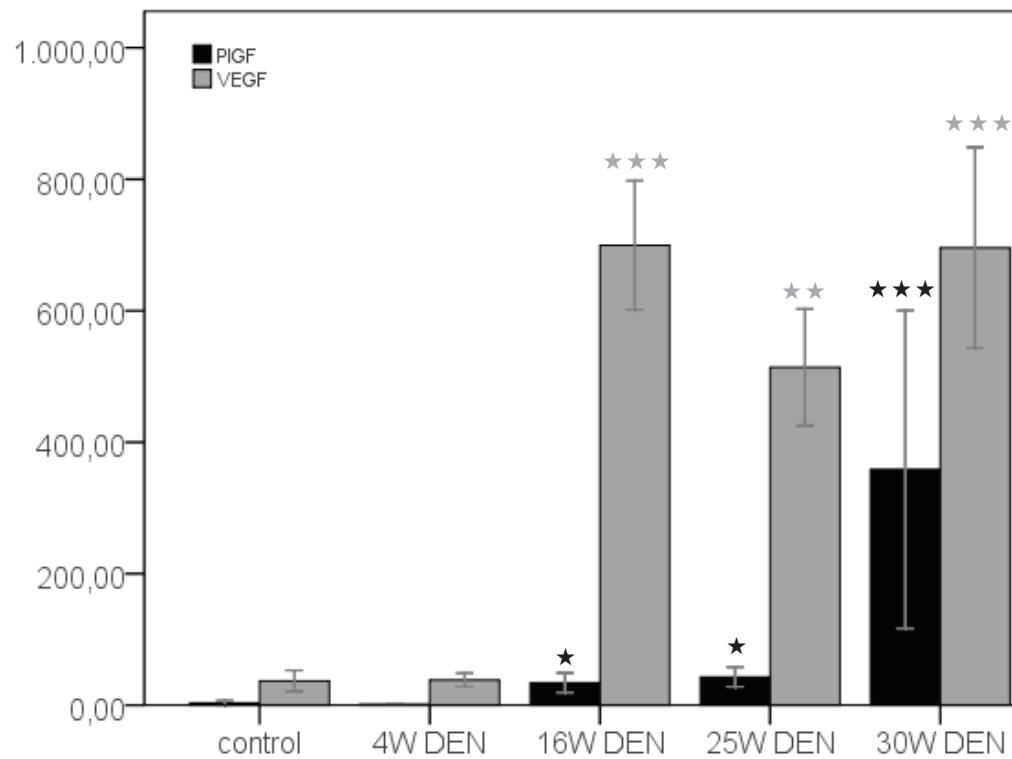

**Protein concentration (pg/ml)  
in serum**

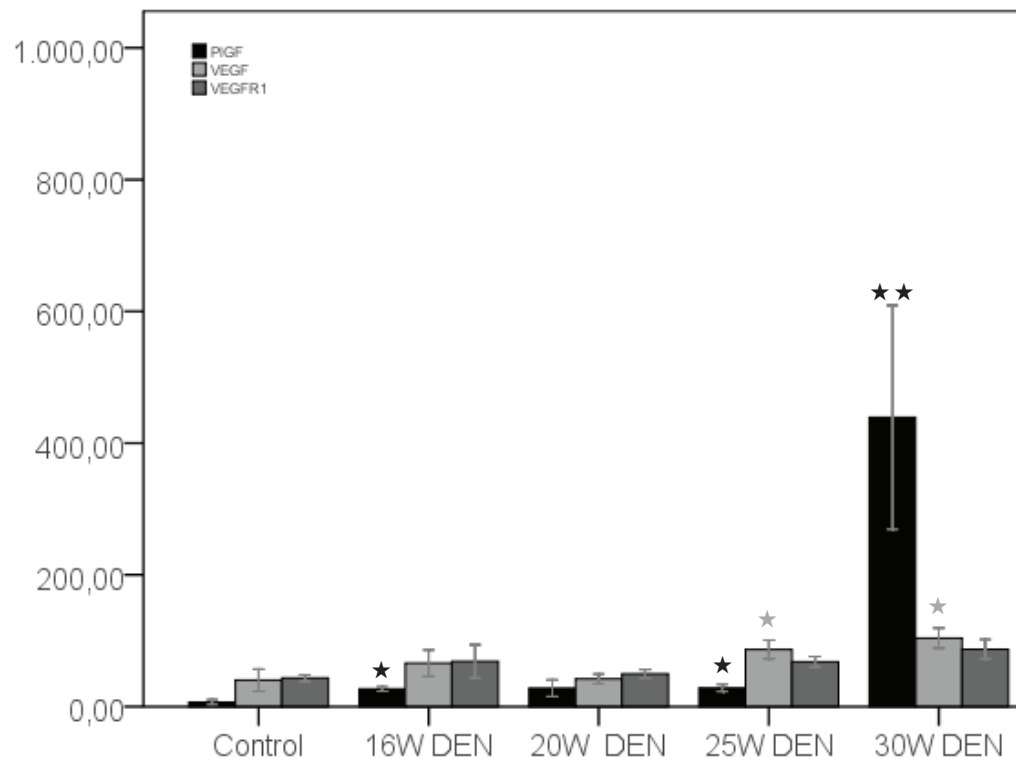

Supplement: MOESM12 [file 9554690]
